RESEARCH ARTICLE

# The effect of fentanyl combined with linezolid on in-hospital mortality in mechanically ventilated patients: A retrospective cohort study

Jia-Hui Niu<sup>1</sup>\*, Xiao-Jiao Cui<sup>2</sup>, Min Chen<sup>2</sup>, Jin-Qi Li<sup>2</sup>, Xiao-Qing Yi<sup>2\*</sup>

**1** Department of Pharmacy, Personalized Drug Research and Therapy Key Laboratory of Sichuan Province, Sichuan Provincial People's Hospital, University of Electronic Science and Technology of China, **2** Sichuan Academy of Medical Sciences, Sichuan Provincial People's Hospital, School of Medicine, University of Electronic Science and Technology of China, Chengdu, China, No. 32, West Second Section, First Ring Road, Chengdu, China

\* These authors contributed equally to this work.

\* [yixiaoqing@med.uestc.edu.cn](mailto:yixiaoqing@med.uestc.edu.cn)

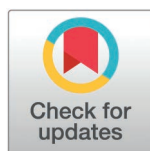

## OPEN ACCESS

**Citation:** Niu J-H, Cui X-J, Chen M, Li J-Q, Yi X-Q (2026) The effect of fentanyl combined with linezolid on in-hospital mortality in mechanically ventilated patients: A retrospective cohort study. PLoS One 21(1): e0337648. <https://doi.org/10.1371/journal.pone.0337648>

**Editor:** Benjamin M. Liu, Children's National Hospital, George Washington University, UNITED STATES OF AMERICA

**Received:** July 29, 2025

**Accepted:** November 10, 2025

**Published:** January 28, 2026

**Copyright:** © 2026 Niu et al. This is an open access article distributed under the terms of the [Creative Commons Attribution License](https://creativecommons.org/licenses/by/4.0/), which permits unrestricted use, distribution, and reproduction in any medium, provided the original author and source are credited.

**Data availability statement:** All relevant data are within the paper and its [Supporting Information](#) files.

**Funding:** The author(s) received no specific funding for this work.

## Abstract

### Background

The combination of linezolid and opioid drugs such as fentanyl may increase the risk of serotonin syndrome, but its impact on in-hospital mortality is not yet clear. The aim of this study is to investigate the effect of simultaneous use of fentanyl and linezolid on in-hospital mortality in mechanically ventilated patients.

### Method

Based on the MIMIC-IV database, 3339 patients receiving mechanical ventilation were enrolled and divided into three groups: the group receiving linezolid simultaneously ( $n=43$ ), the group receiving linezolid within 14 days ( $n=22$ ) and the group that did not use linezolid ( $n=3274$ ). Use multivariate Cox regression analysis to analyze in-hospital mortality rates and adjust for confounding factors.

### Result

The in-hospital mortality rate of the group receiving linezolid simultaneously was 37.2% (16/43), the group receiving linezolid within 14 days was 40.9% (9/22), and the group that did not use linezolid was 22.9% (751/3274). The in-hospital mortality rate of the group receiving linezolid simultaneously was significantly higher than that of the group that did not use linezolid (hazard ratio [HR], 1.56; 95% CI, 1~2.43;  $P=0.049$ ). There was no statistically significant difference in in-hospital mortality rate among the group receiving linezolid within 14 days and the group that did not use linezolid (hazard ratio [HR], 1.01; 95% CI, 0.5~2.05;  $P=0.968$ ). Subgroup analysis showed that there was no interaction between different groups at baseline (age, gender, race, BMI, liver disease, and kidney disease) (interaction  $p$ -value  $>0.05$ ).

**Competing interests:** The authors have declared that no competing interests exist.

## Conclusion

In this post-hoc analysis, we found an association between the combined use of fentanyl and linezolid and increased in-hospital mortality among mechanically ventilated patients. However, this finding is based on studies with small sample sizes and requires further validation through larger, multicenter investigations. In clinical practice, the potential risks of this drug interaction should be carefully evaluated.

## 1 Introduction

Mechanical ventilation is a key supportive measure for treating patients with acute respiratory failure in the intensive care unit (ICU), and effective pain relief and anti-infective treatment are important links to ensure the success of mechanical ventilation. Fentanyl, as a potent  $\mu$ -opioid receptor agonist, is a commonly used analgesic in the ICU [1,2] and is also widely used for analgesia and sedation in mechanically ventilated patients [3,4]. Linezolid has been approved for the treatment of multiple infections, including infections caused by vancomycin-resistant *Enterococcus faecalis*; hospital-acquired pneumonia caused by *Staphylococcus aureus*; complex skin and skin structure infections (cSSSIs); uncomplicated cSSSIs caused by methicillin-sensitive *Staphylococcus aureus* or *Streptococcus pyogenes*; and community-acquired pneumonia caused by *Streptococcus pneumoniae*. Case reports indicate linezolid exhibits susceptibility against bacilli. For ICU patients, methicillin-resistant *Staphylococcus aureus* (MRSA) and vancomycin-resistant *Enterococcus* (VRE) represent the two most prevalent Gram-positive pathogens. Consequently, linezolid is frequently employed to treat infected ICU patients [5–7]. Linezolid, as a weak monoamine oxidase inhibitor (MAOI), can increase the concentration of serotonin (5-HT) in the central nervous system by inhibiting its metabolism [8–10]. Fentanyl and its analogues have been shown to directly inhibit 5-HT transporters and norepinephrine transporters, thereby enhancing 5-HTergic neurotransmission [11–13]. This synergistic effect of pharmacodynamics may induce serotonin syndrome, characterized by autonomic nervous system dysfunction, neuromuscular abnormalities, and changes in mental state [14,15]. Although SS has a low recognition rate in clinical practice, its severe manifestations, such as hypertensive crisis, pulmonary edema, and multiple organ failure, may significantly increase the risk of mortality in patients [16–18].

At present, there is limited research on the impact of fentanyl combined with linezolid on the prognosis of mechanically ventilated patients, especially in terms of in-hospital mortality. Although case reports and systematic reviews suggest that the combination of the two may increase the risk of SS [19–21], large-scale clinical data is still lacking. Therefore, based on the MIMIC-IV database, this study aims to explore the impact of fentanyl combined with linezolid on in-hospital mortality in mechanically ventilated patients and analyze potential risk factors to provide a basis for rational drug use in clinical practice.

## 2 Methods

### 2.1 Data source

We conducted a retrospective cohort study using publicly available clinical data MIMIC-IV [22]. MIMIC-IV version 2.2 is an electronic health record database that includes > 50,000 patients admitted to ICU at the Beth Israel Deaconess Medical Center (Boston, MA, USA) from 2008 to 2019. The Institutional Review Board at the Beth Israel Deaconess Medical Center granted a waiver of informed consent and approved the sharing of the research resource, and Author Xiao-Qing Yi passed the online training courses and exams (certification number: 59888607).

### 2.2 Study population

There were 63,916 patients receiving mechanical ventilation in the MIMIC-IV 2.2 database. We excluded those who did not use fentanyl, had used other opioid drugs, had used antidepressants, and had been in the ICU for less than 24 hours. If a patient is admitted to the ICU multiple times, only the first patient admitted to the ICU will be analyzed.

### 2.3 Exposure and outcomes

The population we studied was patients who used fentanyl during mechanical ventilation, divided into three groups: patients who were not exposed to linezolid, patients who were simultaneously exposed to linezolid, and patients who were exposed to linezolid within 14 days. The use of fentanyl and linezolid was extracted from the “inputevents” table in the ICU. The outcome is a hospital all-cause mortality rate.

### 2.4 Data extraction

Extract data from the MIMIC IV database using structured query language. Collected data included age, sex, ethnicity, and BMI. We extracted laboratory test results 24 hours prior to ICU admission, including WBC, lymphocytes, eosinophils, neutrophils, ALT, AST, creatinine, and glucose. We extracted the patient's comorbidities, including chronic pulmonary disease, rheumatic disease, liver disease, peptic ulcer disease, malignant cancer, myocardial infarct, peripheral vascular disease, cerebrovascular disease, diabetes, and renal disease. Extract infection-related indicators, including suspected infection, positive culture, and use of antibiotics. We also extracted GCS, body temperature, and SIRS.

### 2.5 Statistical analysis

The study cohort was divided into three groups: the group receiving linezolid simultaneously (Simultaneously Lzd), the group receiving linezolid within 14 days (Within 14 Days Lzd), and the group that did not use linezolid (NO-Lzd). The values of BMI greater than 100 or less than 10 were regarded as abnormal values, and the variables with missing values >50% were not included in the study. Multiple imputation was used to estimate the missing value of each variable [23,24]. The mean (standard deviation [SD]) and median (interquartile range [IQR]) should be used to describe normal and non-normal distribution data, respectively [25]. Cox proportional hazards models were created to generate the hazard ratio (HR) with 95% confidence interval (CI) for the in-hospital all-cause mortality. For all analyses, a two-tailed  $P < 0.05$  was considered statistically significant. Finally, according to age, gender, race, BMI, liver disease, and kidney disease were analyzed by the Cox regression model. In addition, likelihood ratio tests were performed to explore potential interactions between subgroups.

All statistical analyses were performed using Free Statistics software version 1.9 and the R software packages (<http://www.R-project.org>, The R Foundation).

### 3 Results

#### 3.1 Patient selection

We retrieved 63,916 patients receiving mechanical ventilation and 21,993 patients receiving fentanyl from the MIMIC-IV database. After excluding patients who were not included in the study, the final study population consisted of 3,339 patients, including 3,274 who did not use linezolid, 43 who also used linezolid, and 22 who used linezolid within 14 days (Fig 1).

#### 3.2 Cohort characteristics

Table 1 shows the baseline characteristics of the Simultaneously Lzd group, Within 14 Days Lzd group, and NO Lzd group. Overall, the bacterial culture rates of patients in the Simultaneously Lzd group 7 (16.7%) and Within 14 Days Lzd group 9 (40.9%) were higher than those in the NO Lzd group 307 (12.2%) [ $p < 0.001$ ]. The Simultaneously Lzd group 24

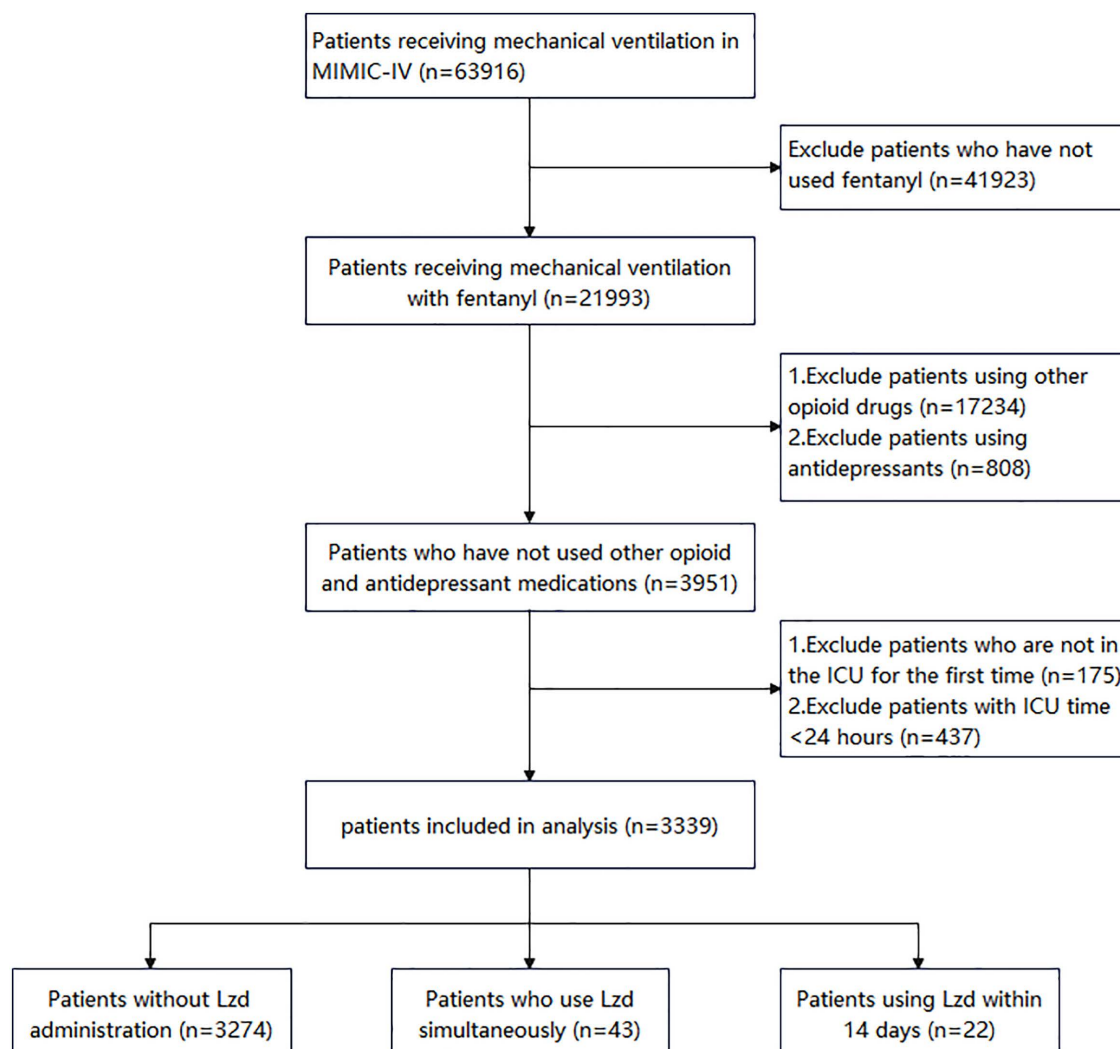

**Fig 1. Flow chart of patient selection.** MIMIC IV, Multiparameter Intelligent Monitoring in Intensive Care Database IV; ICU, intensive care unit.

<https://doi.org/10.1371/journal.pone.0337648.g001>

**Table 1. Baseline characteristics of entire cohort.**

| Variables                          | Overall (n = 3339)   | NO-Lzd (n = 3274)    | Simultaneously Lzd (n = 43) | Within 14 Days Lzd (n = 22) | P value |
|------------------------------------|----------------------|----------------------|-----------------------------|-----------------------------|---------|
| <b>Demographics</b>                |                      |                      |                             |                             |         |
| Age, year                          | 64.6 ± 17.3          | 64.6 ± 17.3          | 64.1 ± 13.8                 | 66.8 ± 17.0                 | 0.825   |
| Gender, Male, n (%)                | 2054 (61.5)          | 2012 (61.5)          | 27 (62.8)                   | 15 (68.2)                   | 0.799   |
| Race white, n (%)                  | 1825 (54.7)          | 1791 (54.7)          | 23 (53.5)                   | 11 (50)                     | 0.896   |
| BMI, kg/m <sup>2</sup>             | 29.1 ± 8.3           | 29.1 ± 8.3           | 32.9 ± 12.1                 | 28.7 ± 8.3                  | 0.011   |
| <b>State of illness</b>            |                      |                      |                             |                             |         |
| Temperature                        | 36.9 ± 0.7           | 36.9 ± 0.7           | 36.9 ± 0.9                  | 37.0 ± 0.8                  | 0.674   |
| First-day gcs                      | 11.1 ± 4.2           | 11.1 ± 4.2           | 9.2 ± 4.8                   | 9.1 ± 3.8                   | 0.002   |
| SIRS, n (%)                        |                      |                      |                             |                             | 0.001   |
| 0                                  | 26 (0.8)             | 26 (0.8)             | 0 (0)                       | 0 (0)                       |         |
| 1                                  | 272 (8.1)            | 271 (8.3)            | 1 (2.3)                     | 0 (0)                       |         |
| 2                                  | 857 (25.7)           | 851 (26)             | 4 (9.3)                     | 2 (9.1)                     |         |
| 3                                  | 1341 (40.2)          | 1315 (40.2)          | 14 (32.6)                   | 12 (54.5)                   |         |
| 4                                  | 843 (25.2)           | 811 (24.8)           | 24 (55.8)                   | 8 (36.4)                    |         |
| Suspected infection, n (%)         |                      |                      |                             |                             | 1       |
| NO                                 | 79 (3.0)             | 78 (3)               | 1 (2.3)                     | 0 (0)                       |         |
| YES                                | 2578 (97.0)          | 2514 (97)            | 42 (97.7)                   | 22 (100)                    |         |
| Positive culture, n (%)            |                      |                      |                             |                             | 0.002   |
| NO                                 | 2255 (87.5)          | 2207 (87.8)          | 35 (83.3)                   | 13 (59.1)                   |         |
| YES                                | 323 (12.5)           | 307 (12.2)           | 7 (16.7)                    | 9 (40.9)                    |         |
| Antibiotic, n (%)                  |                      |                      |                             |                             | < 0.001 |
| NO                                 | 682 (20.4)           | 682 (20.8)           | 0 (0)                       | 0 (0)                       |         |
| YES                                | 2657 (79.6)          | 2592 (79.2)          | 43 (100)                    | 22 (100)                    |         |
| <b>Laboratory Examination</b>      |                      |                      |                             |                             |         |
| WBC                                | 11.4 (8.3, 15.7)     | 11.3 (8.3, 15.7)     | 13.3 (8.1, 20.1)            | 13.4 (10.8, 16.7)           | 0.085   |
| lymphocytes                        | 16.1 (1.1, 109.2)    | 14.0 (1.1, 109.2)    | 8.2 (0.7, 84.6)             | 78.7 (1.5, 138.4)           | 0.139   |
| eosinophils                        | 0.2 (0.0, 5.3)       | 0.2 (0.0, 5.3)       | 0.1 (0.0, 4.5)              | 1.7 (0.0, 9.3)              | 0.507   |
| neutrophils                        | 129.6 (9.8, 926.9)   | 117.2 (9.8, 917.7)   | 54.6 (9.1, 1201.4)          | 833.4 (50.4, 1168.9)        | 0.027   |
| ALT                                | 30.5 (17.0, 71.0)    | 30.5 (17.0, 71.0)    | 38.0 (19.6, 107.0)          | 38.5 (18.4, 64.8)           | 0.69    |
| AST                                | 45.0 (26.0, 110.5)   | 45.0 (26.0, 109.4)   | 63.0 (29.5, 185.1)          | 41.9 (32.7, 108.2)          | 0.374   |
| creatinine                         | 1.1 (0.8, 1.9)       | 1.1 (0.8, 1.9)       | 1.9 (1.2, 4.1)              | 1.3 (0.8, 2.0)              | < 0.001 |
| Glucose                            | 134.0 (109.4, 173.8) | 134.0 (109.4, 173.6) | 142.4 (108.8, 188.2)        | 129.5 (113.7, 168.8)        | 0.551   |
| <b>Comorbidities</b>               |                      |                      |                             |                             |         |
| Chronic pulmonary disease, n (%)   | 871 (26.1)           | 853 (26.1)           | 13 (30.2)                   | 5 (22.7)                    | 0.773   |
| Rheumatic disease, n (%)           | 85 (2.5)             | 83 (2.5)             | 1 (2.3)                     | 1 (4.5)                     | 0.607   |
| Liver disease, n (%)               | 637 (19.1)           | 618 (18.9)           | 15 (34.9)                   | 4 (18.2)                    | 0.034   |
| Peptic ulcer disease, n (%)        | 192 (5.8)            | 188 (5.7)            | 2 (4.7)                     | 2 (9.1)                     | 0.673   |
| Malignant cancer, n (%)            | 319 (9.6)            | 313 (9.6)            | 4 (9.3)                     | 2 (9.1)                     | 1       |
| Myocardial infarct, n (%)          | 702 (21.0)           | 688 (21)             | 7 (16.3)                    | 7 (31.8)                    | 0.338   |
| Peripheral vascular disease, n (%) | 319 (9.6)            | 313 (9.6)            | 4 (9.3)                     | 2 (9.1)                     | 1       |
| Cerebrovascular disease, n (%)     | 509 (15.2)           | 501 (15.3)           | 3 (7)                       | 5 (22.7)                    | 0.193   |
| Diabetes, n (%)                    | 1003 (30.0)          | 970 (29.6)           | 18 (41.9)                   | 15 (68.2)                   | < 0.001 |
| Renal disease, n (%)               | 776 (23.2)           | 751 (22.9)           | 16 (37.2)                   | 9 (40.9)                    | 0.013   |
| <b>Events</b>                      |                      |                      |                             |                             |         |
| In-hospital mortality, n (%)       | 776 (23.2)           | 751 (22.9)           | 16 (37.2)                   | 9 (40.9)                    | 0.013   |
| LOS hospital, days (IQR)           | 7.6 (4.1, 13.0)      | 7.6 (4.1, 13.0)      | 9.4 (3.2, 20.2)             | 13.5 (8.3, 19.7)            | 0.007   |

gcs, glasgow coma scale; SIRS, systemic inflammatory response syndrome; LOS, length of stay.

<https://doi.org/10.1371/journal.pone.0337648.t001>

(55.8%) and the Within 14 Days Lzd group 8 (36.4%) had more patients with SIRS=4 than the NO Lzd group 811 (24.8%) [ $p<0.001$ ]. In laboratory indicators, the Simultaneously Lzd group (1.9) and Within 14 Days Lzd group (1.3) had higher creatinine levels than the NO Lzd group (1.1) [ $p<0.001$ ]. There was a statistical difference among the three groups in the three complications of liver disease, kidney disease, and diabetes [ $p<0.05$ ].

### 3.3 In-hospital mortality rate results

The overall in-hospital mortality rate was 23.2% (776/3339). Table 1 shows that the in-hospital mortality rate in the Simultaneously Lzd group was 37.2% (16/43), 40.9% (9/22) in the Within 14 Days Lzd group, and 22.9% (751/3274) in the NO Lzd group (Table 1). In the multivariate Cox regression analysis, we adjusted five models, including covariates that showed significant differences ( $P<0.05$ ) in the univariate analysis (Table 2). Compared with the NO Lzd group, in the

**Table 2. Univariate Cox regression analysis of in-hospital mortality rate.**

| Variable                    | HR(95%CI)              | P(Wald's test) |
|-----------------------------|------------------------|----------------|
| age                         | 1.0031 (0.9986,1.0076) | 0.18           |
| Male                        | 0.94 (0.81,1.09)       | 0.392          |
| Withe                       | 0.8 (0.69,0.92)        | 0.002          |
| BMI (cont. var.)            | 1.0028 (0.9945,1.0111) | 0.51           |
| antibiotic                  | 2.24 (1.7,2.96)        | < 0.001        |
| firstday.gcs                | 0.96 (0.94,0.98)       | < 0.001        |
| temperature_mean            | 0.65 (0.6,0.7)         | < 0.001        |
| Suspected infection         | 0.9986 (0.6397,1.5587) | 0.995          |
| Positive culture            | 1.61 (1.31,1.96)       | < 0.001        |
| SIRS: ref. =0               |                        |                |
| 1                           | 1.33 (0.17,10.17)      | 0.783          |
| 2                           | 3.56 (0.5,25.53)       | 0.206          |
| 3                           | 5.85 (0.82,41.65)      | 0.078          |
| 4                           | 10.98 (1.54,78.22)     | 0.017          |
| Chronic pulmonary disease   | 1.06 (0.9,1.25)        | 0.461          |
| Rheumatic disease           | 1.29 (0.86,1.92)       | 0.218          |
| Liver disease               | 1.75 (1.49,2.05)       | < 0.001        |
| Peptic ulcer disease        | 0.65 (0.44,0.96)       | 0.032          |
| Malignant cancer            | 1.54 (1.25,1.91)       | < 0.001        |
| Myocardial infarct          | 1.35 (1.14,1.59)       | < 0.001        |
| Peripheral vascular disease | 1.55 (1.26,1.92)       | < 0.001        |
| Cerebrovascular disease0    | 0.81 (0.66,0.99)       | 0.042          |
| Diabetes                    | 0.94 (0.8,1.1)         | 0.438          |
| Renal disease               | 1.17 (0.99,1.38)       | 0.059          |
| WBC                         | 1.02 (1.02,1.02)       | < 0.001        |
| Lymphocytes                 | 1.0001 (1,1.0002)      | < 0.001        |
| Eosinophils                 | 0.98 (0.97,0.99)       | < 0.001        |
| Neutrophils                 | 0.9999 (0.9998,1.0001) | 0.305          |
| ALT                         | 1.0001 (1.0001,1.0002) | < 0.001        |
| AST                         | 1.0001 (1.0001,1.0002) | < 0.001        |
| Creatinine                  | 1.12 (1.09,1.15)       | < 0.001        |
| Glucose                     | 1 (1,1)                | 0.163          |
| Simultaneously Lzd          | 2.19 (1.43,3.35)       | < 0.001        |
| Within 14 Days Lzd          | 1.27 (0.63,2.54)       | 0.506          |

<https://doi.org/10.1371/journal.pone.0337648.t002>

unadjusted model, the Simultaneously Lzd group had an increased risk of in-hospital mortality by 119% (HR, 2.19; 95% CI, 1.43–3.35;  $P < 0.001$ ) (Table 3). After adjusting for confounding factors such as age, gender, race, BMI, and covariates that showed significant differences ( $P < 0.05$ ) in univariate analysis, the HR of the Simultaneous Lzd group in multivariate analysis was 1.56 (95% CI, 1–2.43;  $p = 0.049$ ) (Table 3). There was no statistically significant difference in in-hospital mortality rate between the Lzd group within 14 days and the NO Lzd group ( $p > 0.5$ ).

### 3.4 Subgroup analyses

Fig 2 shows the subgroup analysis results of in-hospital mortality rate. All subgroup analyses indicate that regardless of baseline patient characteristics, the Simultaneously Lzd group increases in-hospital mortality ( $HR > 1$ ). Especially in the subgroup analysis of age  $\geq 65$ , there was a statistically significant increase in the risk of in-hospital mortality (HR, 1.92; 95% CI, 1.11–3.33;  $P = 0.02$ ).

## 4 Discussion

The study findings indicate that concurrent use of fentanyl and linezolid may be associated with increased in-hospital mortality among mechanically ventilated patients. However, this association (adjusted hazard ratio 1.56) should be interpreted with caution, as it is marginally statistically significant (95% CI: 1.00–2.43,  $P = 0.049$ ) and based on limited analytical data. Most critically, the small number of patients ( $n = 43$ ) and outcome events (16 deaths) in the combination group rendered our multivariate model statistically unstable and underpowered. Furthermore, patients receiving this combination had more severe baseline conditions, higher creatinine levels, and higher SIRS scores, along with a greater prevalence of comorbidities such as hepatic and renal disease. Despite statistical adjustments, substantial residual confounding due to indications may persist, suggesting that the observed mortality signal may reflect underlying disease severity as well as potential drug interactions. Therefore, we interpret this finding as a hypothesis-generating and preliminary result.

The pharmacological characteristics of these two drugs provide a plausible yet unproven biological rationale for explaining potential risks: fentanyl reduces serotonin reuptake by inhibiting the serotonin transporter, while linezolid, as a weak MAOI, decreases serotonin metabolism [10,13]. This dual mechanism may lead to excessive serotonin levels, increasing the risk of SS or related complications such as autonomic instability, hyperthermia, or multiple organ failure [9,18]. Furthermore, fentanyl respiratory depressant effects may be exacerbated by linezolid neurotoxicity, particularly in mechanically ventilated patients experiencing weaning difficulties or ventilatory failure [21]. However, it must be emphasized that our

**Table 3. Multivariable Cox regression analysis for in-hospital mortality.**

| Categories                   | Model I             |         | Model II            |         | Model III           |         | Model IV            |         | Model V            |         |
|------------------------------|---------------------|---------|---------------------|---------|---------------------|---------|---------------------|---------|--------------------|---------|
|                              | HR (95%CI)          | P-value | HR (95%CI)          | P-value | HR (95%CI)          | P-value | HR (95%CI)          | P-value | HR (95%CI)         | P-value |
| <b>In-hospital mortality</b> |                     |         |                     |         |                     |         |                     |         |                    |         |
| NO-Lzd                       | 1(Ref)              |         | 1(Ref)              |         | 1(Ref)              |         | 1(Ref)              |         | 1(Ref)             |         |
| Simultaneously Lzd           | 2.19<br>(1.43~3.35) | <0.001  | 2.21<br>(1.44~3.39) | <0.001  | 1.58<br>(1.02~2.46) | 0.04    | 1.59<br>(1.02~2.46) | 0.04    | 1.56<br>(1~2.43)   | 0.049   |
| Within 14 Days Lzd           | 1.27<br>(0.63~2.54) | 0.506   | 1.27<br>(0.63~2.55) | 0.504   | 0.87<br>(0.43~1.75) | 0.698   | 0.97<br>(0.48~1.96) | 0.936   | 1.01<br>(0.5~2.05) | 0.968   |

Model I: did not adjust any variables.

Model II: adjusted for age, gender, race, BMI.

Model III: adjusted for II covariates, temperature, firstday gcs, positive culture, SIRS, antibiotic.

Model IV: adjusted for III covariates, WBC, lymphocytes, eosinophils, ALT, AST, creatinine.

Model V: adjusted for IV covariates, liver disease, peptic ulcer disease, malignant cancer, myocardial infarct, peripheral vascular disease, cerebrovascular disease.

<https://doi.org/10.1371/journal.pone.0337648.t003>

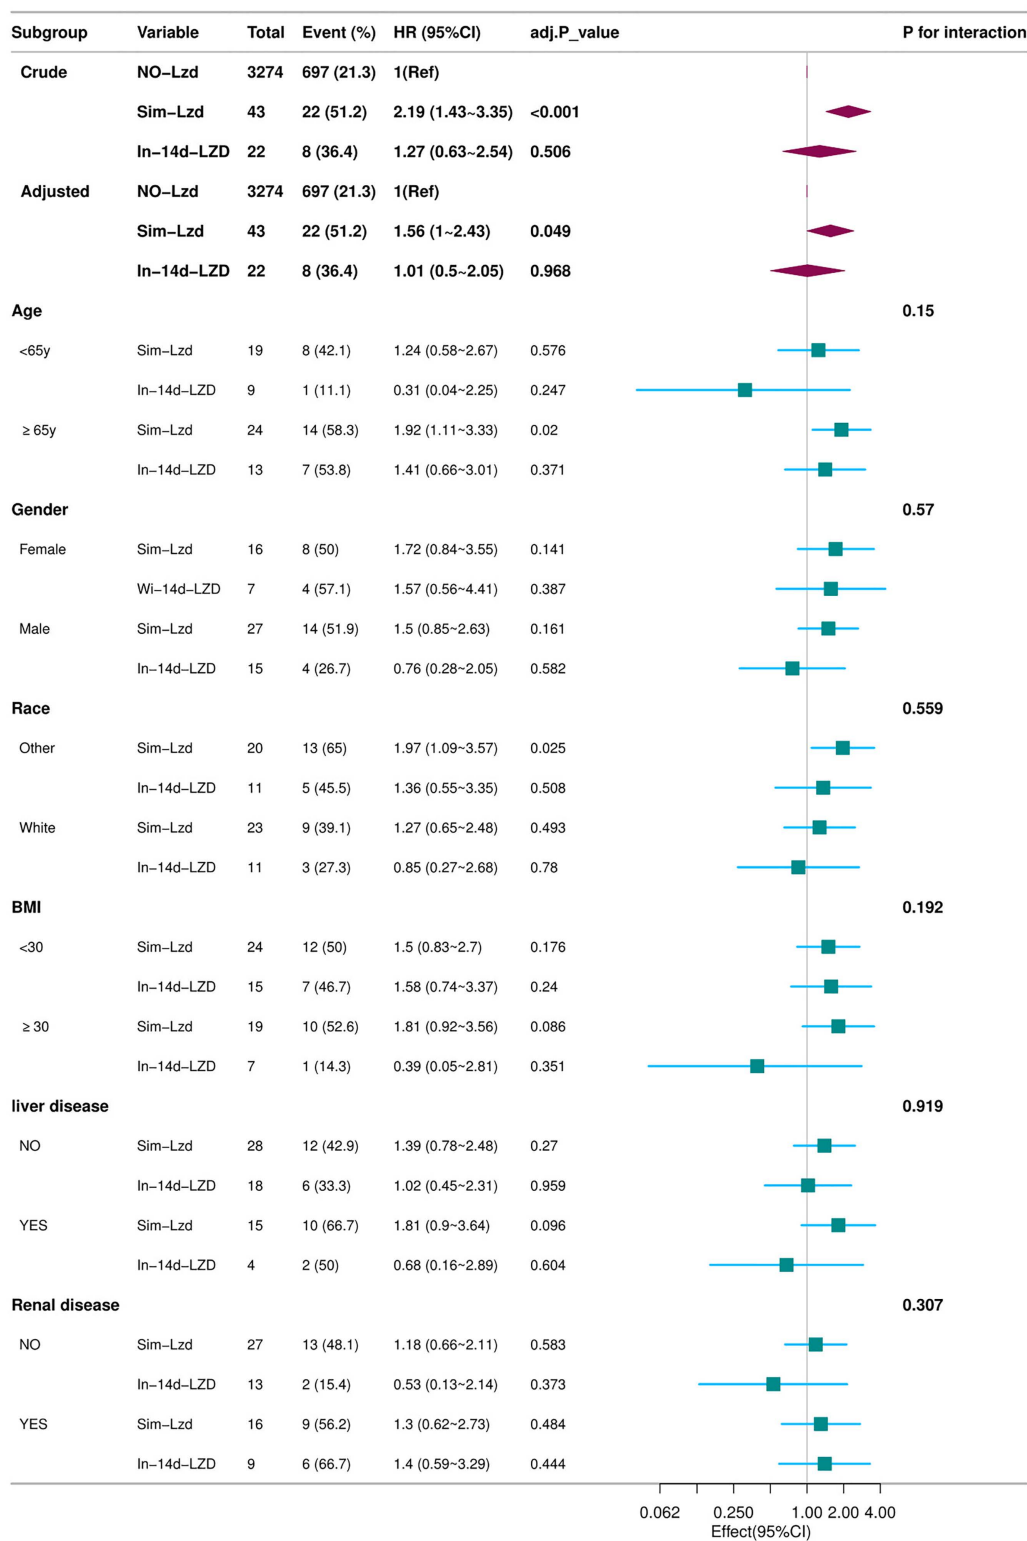

**Fig 2. Subgroup analyses for in-hospital mortality.** The multivariable Cox proportional hazards model was adjusted for temperature, firstday gcs, positive culture, sirs, antibiotic, wbc, lymphocytes, eosinophils, alt, ast, creatinine, peptic ulcer disease, malignant cancer, myocardial infarct, peripheral vascular disease, cerebrovascular disease.

<https://doi.org/10.1371/journal.pone.0337648.g002>

study lacks direct measurements of serotonin levels and clinical diagnoses of SS, rendering the proposed mechanism speculative. Based solely on our data, the observed mortality association cannot be fully attributed to this interaction.

Subgroup analysis revealed that patients aged 65 years or older were particularly vulnerable, exhibiting a statistically significant increase in mortality risk (HR = 1.92, 95% CI = 1.11–3.33,  $P = 0.02$ ). This aligns with case reports describing mortality outcomes in elderly patients [26,27]. However, this subgroup analysis is also severely limited by its small sample size and should be regarded as an exploratory finding.

In conclusion, this study identifies a preliminary signal that warrants further investigation but fails to provide robust evidence for a causal link between simultaneous fentanyl-linezolid use and increased mortality. The primary contribution of this work is to highlight a complex clinical scenario where therapeutic necessity and potential risk must be balanced and to underscore the critical need for more definitive research. Future investigations should ideally be large, multi-center prospective studies or well-designed target trial emulations that are adequately powered to account for the significant baseline confounding and the low prevalence of this drug combination. Until such evidence is available, clinicians should remain aware of the potential risks discussed in the pharmacological literature and maintain a high level of vigilance when the concurrent use of these medications is unavoidable, particularly in older and more vulnerable patients.

## 5 Limitations

This study has several limitations. First, its retrospective design precludes causal inferences, and unmeasured confounders (e.g., severity of infection or undiagnosed SS) may have influenced outcomes. Second, the small sample size of the linezolid-exposed groups ( $n = 43$  and  $n = 22$ ) limits statistical power, particularly for subgroup analyses. Third, the MIMIC-IV database lacks detailed pharmacodynamics data (e.g., serotonin levels or SS diagnoses), which would strengthen mechanistic conclusions. Future prospective studies should incorporate these metrics to validate the observed association.

## 6 Conclusion

Studies indicate that concurrent use of fentanyl and linezolid in mechanically ventilated patients is associated with increased in-hospital mortality. However, this finding is based on studies with small sample sizes and requires validation through larger, multicenter investigations. This association may relate to drug interactions, necessitating further research to elucidate the underlying mechanisms and explore risk mitigation strategies. In clinical practice, the potential risks of this drug interaction should be assessed, and alternative medications should be prioritized.

## Supporting information

### S1 Data. Data - 12.17.

(XLSX)

## Author contributions

**Conceptualization:** Min Chen.

**Data curation:** Xiao-Qing Yi.

**Formal analysis:** Min Chen.

**Investigation:** Xiao-Qing Yi.

**Methodology:** Xiao-Qing Yi.

**Project administration:** Jin-Qi Li.

**Supervision:** Jin-Qi Li.

**Writing – original draft:** Jia-Hui Niu, Xiao-Jiao Cui.

**Writing – review & editing:** Xiao-Jiao Cui.

## References

1. Martin J, Parsch A, Franck M, Wernecke KD, Fischer M, Spies C. Practice of sedation and analgesia in German intensive care units: results of a national survey. *Crit Care*. 2005;9(2):R117-23. <https://doi.org/10.1186/cc3035> PMID: [15774043](#)
2. Soliman HM, Mélot C, Vincent JL. Sedative and analgesic practice in the intensive care unit: the results of a European survey. *Br J Anaesth*. 2001;87(2):186–92. <https://doi.org/10.1093/bja/87.2.186> PMID: [11493487](#)
3. Casamento A, Bellomo R. Fentanyl versus morphine for analgo-sedation in mechanically ventilated adult ICU patients. *Crit Care Resusc*. 2019;21(2):76–83. [https://doi.org/10.1016/s1441-2772\(23\)00666-x](https://doi.org/10.1016/s1441-2772(23)00666-x) PMID: [31142236](#)
4. Aoki Y, Kato H, Fujimura N, Suzuki Y, Sakuraya M, Doi M. Effects of fentanyl administration in mechanically ventilated patients in the intensive care unit: a systematic review and meta-analysis. *BMC Anesthesiol*. 2022;22(1):323. <https://doi.org/10.1186/s12871-022-01871-7> PMID: [36271330](#)
5. Yue J, Dong BR, Yang M, Chen X, Wu T, Liu GJ. Linezolid versus vancomycin for skin and soft tissue infections. *Cochrane Database Syst Rev*. 2016;2016(1):CD008056. <https://doi.org/10.1002/14651858.CD008056.pub3> PMID: [26758498](#)
6. Hashemian SMR, Farhadi T, Ganjparvar M. Linezolid: a review of its properties, function, and use in critical care. *Drug Des Devel Ther*. 2018;12:1759–67. <https://doi.org/10.2147/DDDT.S164515> PMID: [29950810](#)
7. Liu BM, Beck EM, Fisher MA. The Brief Case: Ventilator-Associated *Corynebacterium accolens* Pneumonia in a Patient with Respiratory Failure Due to COVID-19. *J Clin Microbiol*. 2021;59(9):e0013721. <https://doi.org/10.1128/JCM.00137-21> PMID: [34406882](#)
8. Gupta V, Karnik ND, Deshpande R, Patil MA. Linezolid-induced serotonin syndrome. *BMJ Case Rep*. 2013;2013:bcr2012008199. <https://doi.org/10.1136/bcr-2012-008199> PMID: [23513014](#)
9. Elbarbry F, Moshirian N. Linezolid-associated serotonin toxicity: a systematic review. *Eur J Clin Pharmacol*. 2023;79(7):875–83. <https://doi.org/10.1007/s00228-023-03500-9> PMID: [37129603](#)
10. Wali HA. Linezolid and serotonin syndrome. *J Int Med Res*. 2025;53(2):3000605251315355. <https://doi.org/10.1177/03000605251315355> PMID: [39932284](#)
11. Wittmann M, Schaaf T, Peters I, Wirz S, Urban BW, Barann M. The effects of fentanyl-like opioids and hydromorphone on human 5-HT<sub>3A</sub> receptors. *Anesth Analg*. 2008;107(1):107–12. <https://doi.org/10.1213/ane.0b013e31817342c2> PMID: [18635474](#)
12. Barann M, Stamer UM, Lyutenska M, Stüber F, Bönsch H, Urban B. Effects of opioids on human serotonin transporters. *Naunyn Schmiedeberg Arch Pharmacol*. 2015;388(1):43–9. <https://doi.org/10.1007/s00210-014-1056-3> PMID: [25332055](#)
13. Rickli A, Liakoni E, Hoener MC, Liechti ME. Opioid-induced inhibition of the human 5-HT and noradrenaline transporters in vitro: link to clinical reports of serotonin syndrome. *Br J Pharmacol*. 2018;175(3):532–43. <https://doi.org/10.1111/bph.14105> PMID: [29210063](#)
14. Gillman PK. Monoamine oxidase inhibitors, opioid analgesics and serotonin toxicity. *Br J Anaesth*. 2005;95(4):434–41. <https://doi.org/10.1093/bja/aei210> PMID: [16051647](#)
15. Baldo BA, Rose MA. The anaesthetist, opioid analgesic drugs, and serotonin toxicity: a mechanistic and clinical review. *Br J Anaesth*. 2020;124(1):44–62. <https://doi.org/10.1016/j.bja.2019.08.010> PMID: [31653394](#)
16. Shahbazi F, Shojaei L. Hypertensive Crisis Associated with Serotonin Syndrome Following Linezolid Administration: Report of Two Cases. *Curr Drug Saf*. 2025;20(2):241–6. <https://doi.org/10.2174/0115748863299100240507052341> PMID: [38847376](#)
17. Shah ND, Jain AB. Serotonin syndrome presenting as pulmonary edema. *Indian J Pharmacol*. 2016;48(1):93–5. <https://doi.org/10.4103/0253-7613.174575> PMID: [26997733](#)
18. McGreevy JL, Piraino ST, Sandhu G. Fentanyl-Associated Serotonin Syndrome and Chest Wall Rigidity in an Intensive Care Unit Patient. *Am J Ther*. 2019;26(5):e612–4. <https://doi.org/10.1097/MJT.0000000000000813> PMID: [29965805](#)
19. Samartzis L, Savvari P, Kontogiannis S, Dimopoulos S. Linezolid is associated with serotonin syndrome in a patient receiving amitriptyline, and fentanyl: a case report and review of the literature. *Case Rep Psychiatry*. 2013;2013:617251. <https://doi.org/10.1155/2013/617251> PMID: [23533900](#)
20. Corsini Campioli C, Barth D, Esquer Garrigos Z, Abu Saleh O, Sohail RM, Sia IG. Linezolid and fentanyl: An underrecognized drug-to-drug interaction. *J Clin Pharm Ther*. 2020;45(4):825–7. <https://doi.org/10.1111/jcpt.13143> PMID: [32304579](#)
21. Mitwally H, Saad MO, Alkhiyami D, Fahmi AM, Mahmoud S, Hmoud EA, et al. Risk of serotonin syndrome in acutely ill patients receiving linezolid and opioids concomitantly: a retrospective cohort study. *IJID Reg*. 2022;5:137–40. <https://doi.org/10.1016/j.ijregi.2022.09.008> PMID: [36324824](#)
22. Johnson AEW, Bulgarelli L, Shen L, Gayles A, Shammout A, Horng S, et al. MIMIC-IV, a freely accessible electronic health record dataset | Scientific Data. [cited 11 Apr 2024]. Available from: <https://www.nature.com/articles/s41597-022-01899-x>
23. Sterne JAC, White IR, Carlin JB, Spratt M, Royston P, Kenward MG, et al. Multiple imputation for missing data in epidemiological and clinical research: potential and pitfalls. *BMJ*. 2009;338:b2393. <https://doi.org/10.1136/bmj.b2393> PMID: [19564179](#)
24. Mackinnon A. The use and reporting of multiple imputation in medical research - a review. *J Intern Med*. 2010;268(6):586–93. <https://doi.org/10.1111/j.1365-2796.2010.02274.x> PMID: [20831627](#)

25. Habibzadeh F. Statistical Data Editing in Scientific Articles. *J Korean Med Sci*. 2017;32(7):1072. <https://doi.org/10.3346/jkms.2017.32.7.1072>
26. Sutton J, Stroup J, Som M. Linezolid-induced serotonin toxicity in a patient not taking monoamine oxidase inhibitors or serotonin receptor antagonists. *Proc (Bayl Univ Med Cent)*. 2016;29(2):214–5. <https://doi.org/10.1080/08998280.2016.11929423> PMID: [27034576](https://pubmed.ncbi.nlm.nih.gov/27034576/)
27. Bernard L, Stern R, Lew D, Hoffmeyer P. Serotonin Syndrome after Concomitant Treatment with Linezolid and Citalopram. *Clin Infect Dis*. 2003;36(9):1197–1197. <https://doi.org/10.1086/374558>
